# Supplementary material for: h-BN nanosheets as simple and effective additives to largely enhance the activity of Au/TiO2 plasmonic photocatalysts
Source: Royal Society of Chemistry journal article supplement (doi:10.1039/c5cp05958e), 2015-11-04
Supplement: c5cp05958e1.pdf [file c5cp05958e1.pdf]

Electronic Supplementary Information for:

## **h-BN nanosheets as simple and effective additives to largely enhance the activity of Au/TiO<sub>2</sub> plasmonic photocatalysts**

### **Experimental**

*Materials.* P25 and TS-1 (BET surface areas are 50 and 262 m<sup>2</sup> g<sup>-1</sup>, respectively) were supplied by Nippon Aerosil and Catalysis Society of Japan, respectively. Au/P25 was prepared according to the literature<sup>11c</sup> as follows: P25 (1.0 g) was added to water (50 mL) containing HAuCl<sub>4</sub>·3H<sub>2</sub>O (44.4 mg, 2 wt% of loaded Au). The solution pH was adjusted to ca. 7 with NaOH, and the solution was stirred at 353 K for 3 h. The particles were recovered by centrifugation, washed thoroughly with water and dried at 353 K for 12 h. The powders were calcined under air at 673 K for 2 h (a heating rate of 2 K min<sup>-1</sup>).<sup>11c</sup> h-BN nanosheets were prepared as follows.<sup>21c</sup> Commercially available micrometer size BN particles (1 g, Aldrich) were dispersed in a DMF solution using a high power (7000-8000 W) ultrasonic cleaner for 20 h and then centrifuged at 10000 rpm for 5 h to precipitate (remove) large-size BN flakes, resulting in thin BN sheets. The obtained thin sheets were annealed at 1200 °C for 4 h under N<sub>2</sub> flow to improve their crystallinity. The obtained h-BN nanosheets has a lateral size of up to 2 μm, thickness of up to 20 nm, and BET surface area of 15 m<sup>2</sup> g<sup>-1</sup>. MPTNF was prepared according to the reported procedures and the BET surface area was 236 m<sup>2</sup> g<sup>-1</sup>.<sup>16</sup>

*Photocatalytic activity tests.* Au/P25 (15 mg) and the additive (0–3 mg) were mixed in a O<sub>2</sub>-saturated aqueous solution of formic acid (5 vol%) in a stainless-steel container (75 mL) equipped with Pyrex window by ultrasonication (1 min) and the subsequent stirring (5 min) under dark. The dispersion was photoirradiated at λ > 420 nm by a solar simulator (San-Ei Electric, 1000 W m<sup>-2</sup>) through UV cutting filter, under stirring. The gas in the container was withdrawn with a gas-tight syringe and quantified using a BID gas chromatograph (Shimadzu BID-2010 plus) equipped with a Micropacked ST column.

*ESR analysis.* The ESR spectra were recorded on a JEOL JES RE-1X spectrometer (X-band). The magnetic field was calibrated and radical yields were determined using Mn<sup>2+</sup>/MgO as a standard marker. Au/P25 (15 mg) and the additive (1.5 mg) were mixed in a mortar and a portion (10 mg) of the mixture was placed in a quartz ESR tube, which was evacuated at 423 K for 1 h and cooled to room temperature. O<sub>2</sub> (20 Torr) was introduced into the tube and kept for 10 min. The tube was photoirradiated at room temperature using the 500 W-Xe lamp at λ > 420 nm for 5 min. The tube was then evacuated for 10 min to remove excess O<sub>2</sub> and analysed at 77 K.
